# Supplementary material for: The Role of T-Cadherin (CDH13) in Treatment Options with Garcinol in Melanoma
Source: MDPI journal article supplement (doi:10.3390/cancers16101853), 2024-05-12

Figure 2 A

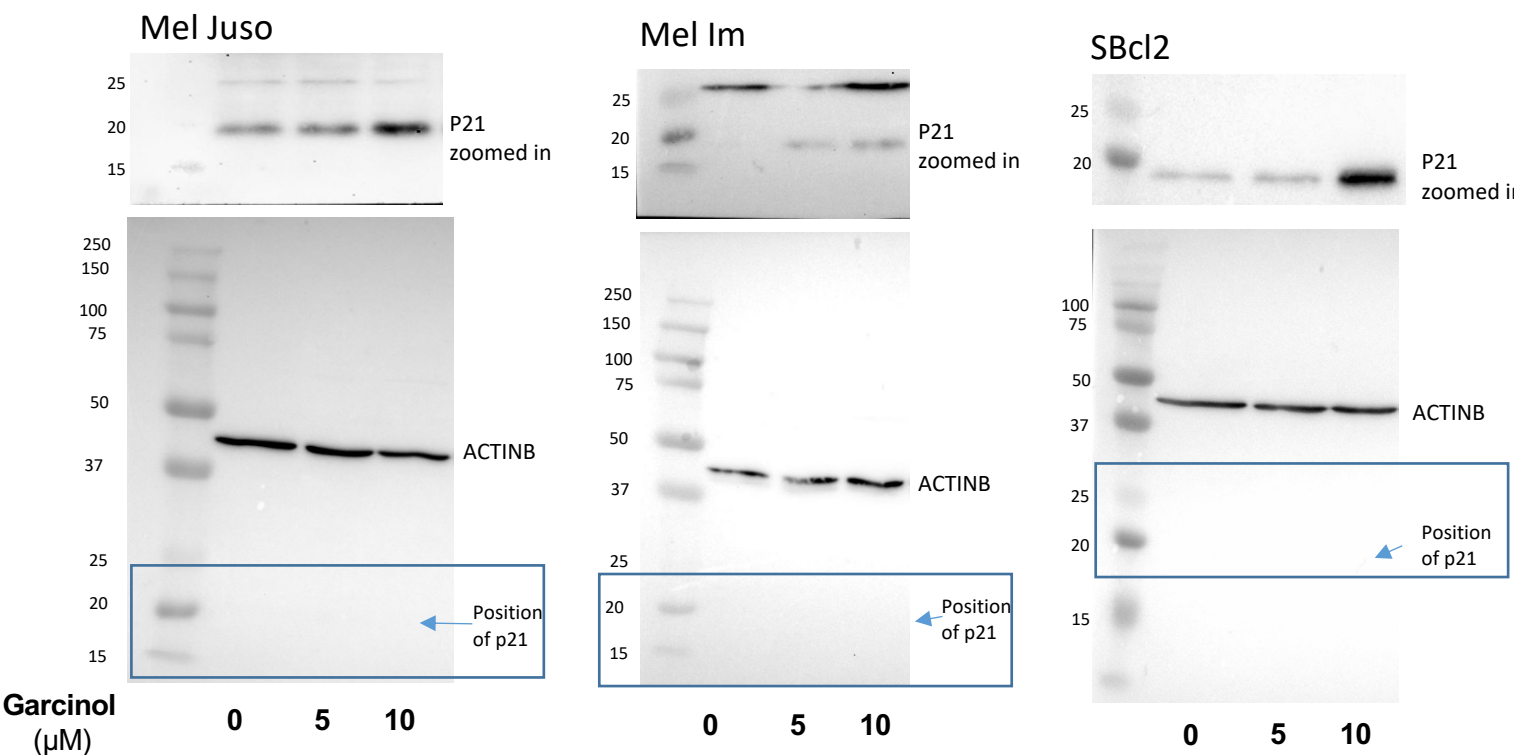

We do not have the complete western blots for p21 because the molecule was so difficult to detect at the edge of the gel. However, based on the comparison of the standard, we can see where the band is located and that it is the appropriate loading control.

Figure 2 C

Mel Juso

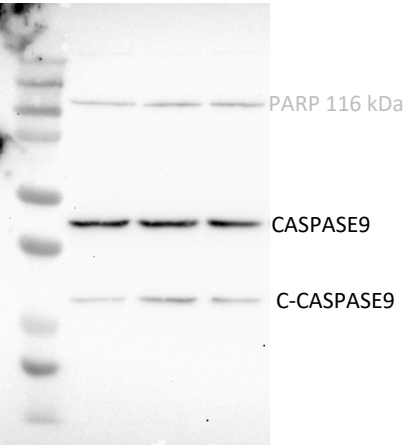

Mel Im

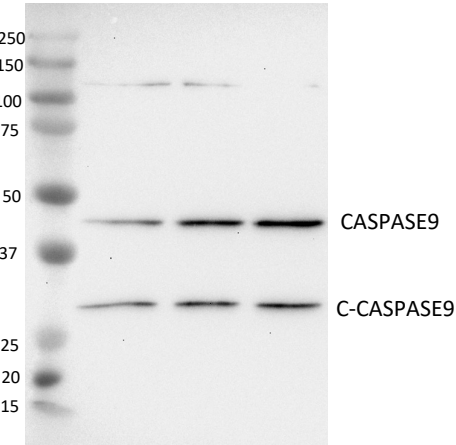

SBcl2

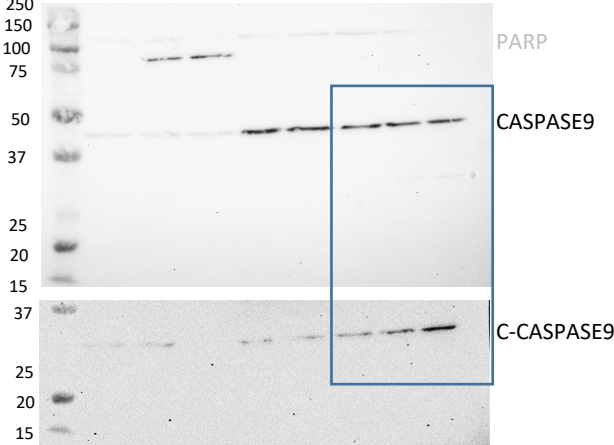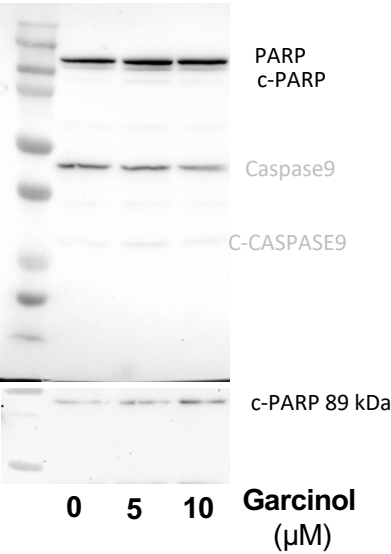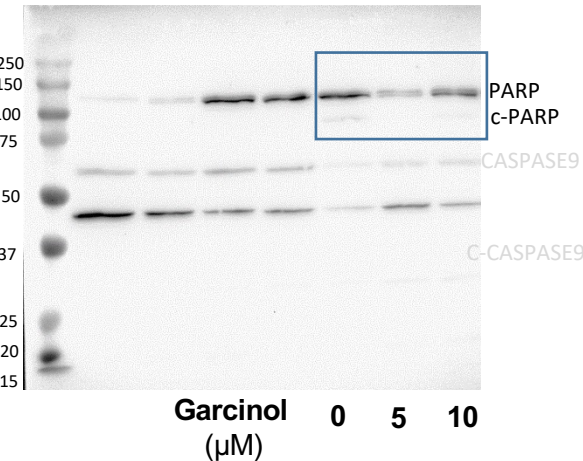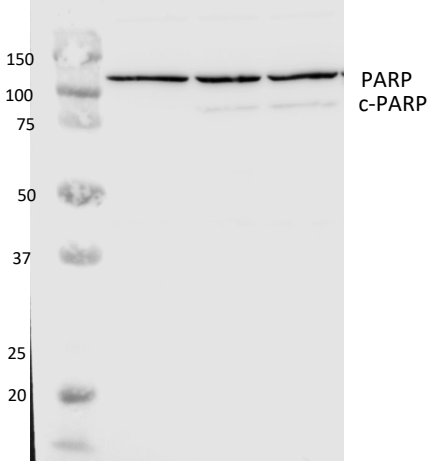

cleaved PARP:  
long exposure  
because the  
bands  
were not  
visible  
when the  
strong PARP  
signal was  
developed

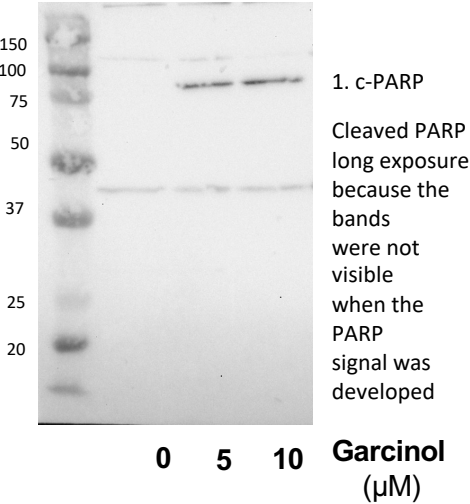

1. c-PARP  
Cleaved PARP  
long exposure  
because the  
bands  
were not  
visible  
when the  
PARP  
signal was  
developed

Figure 3A

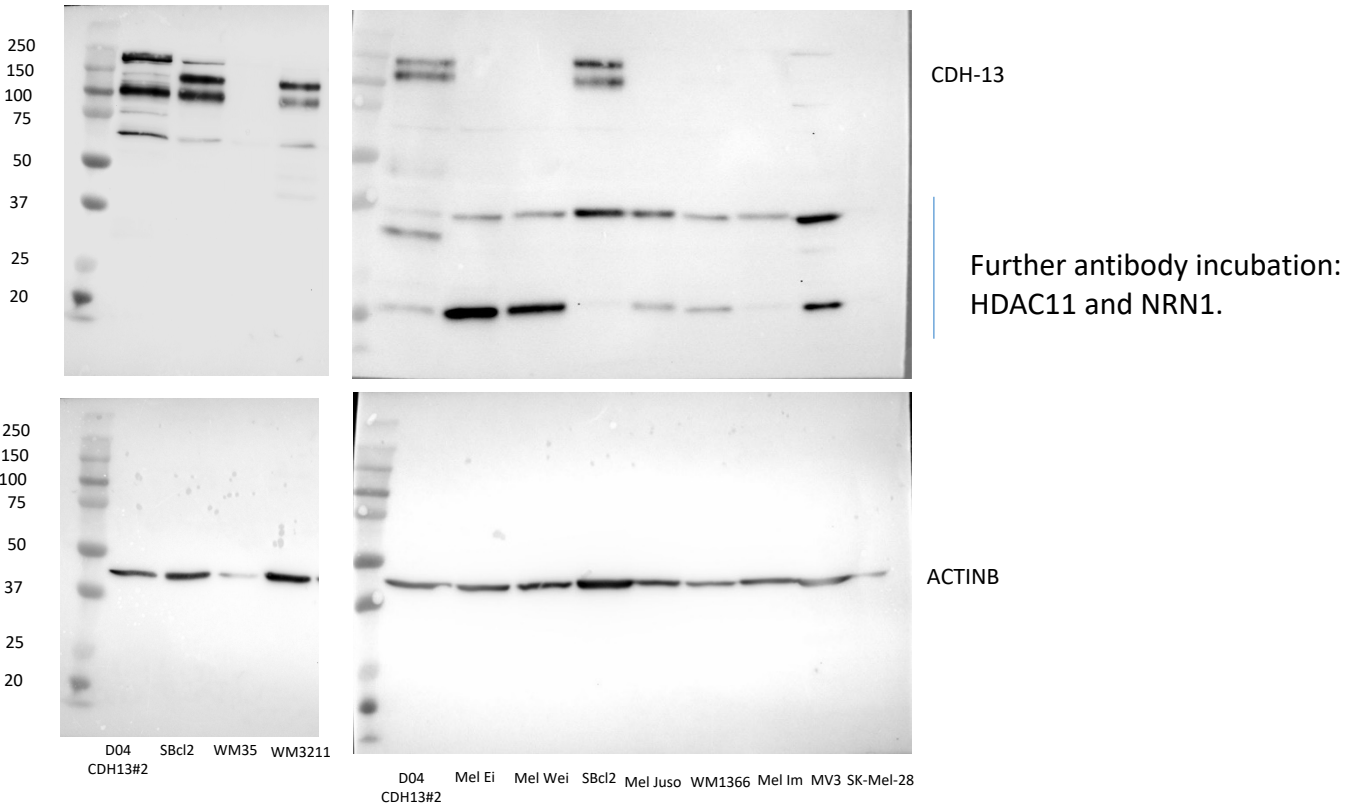

The double band observed in the western blots reflects the expression of the mature CDH13 (105 kDa) and the uncleaved CDH13 precursor (130 kDa). Lower bands are shedded CDH13.

Figure 3 B

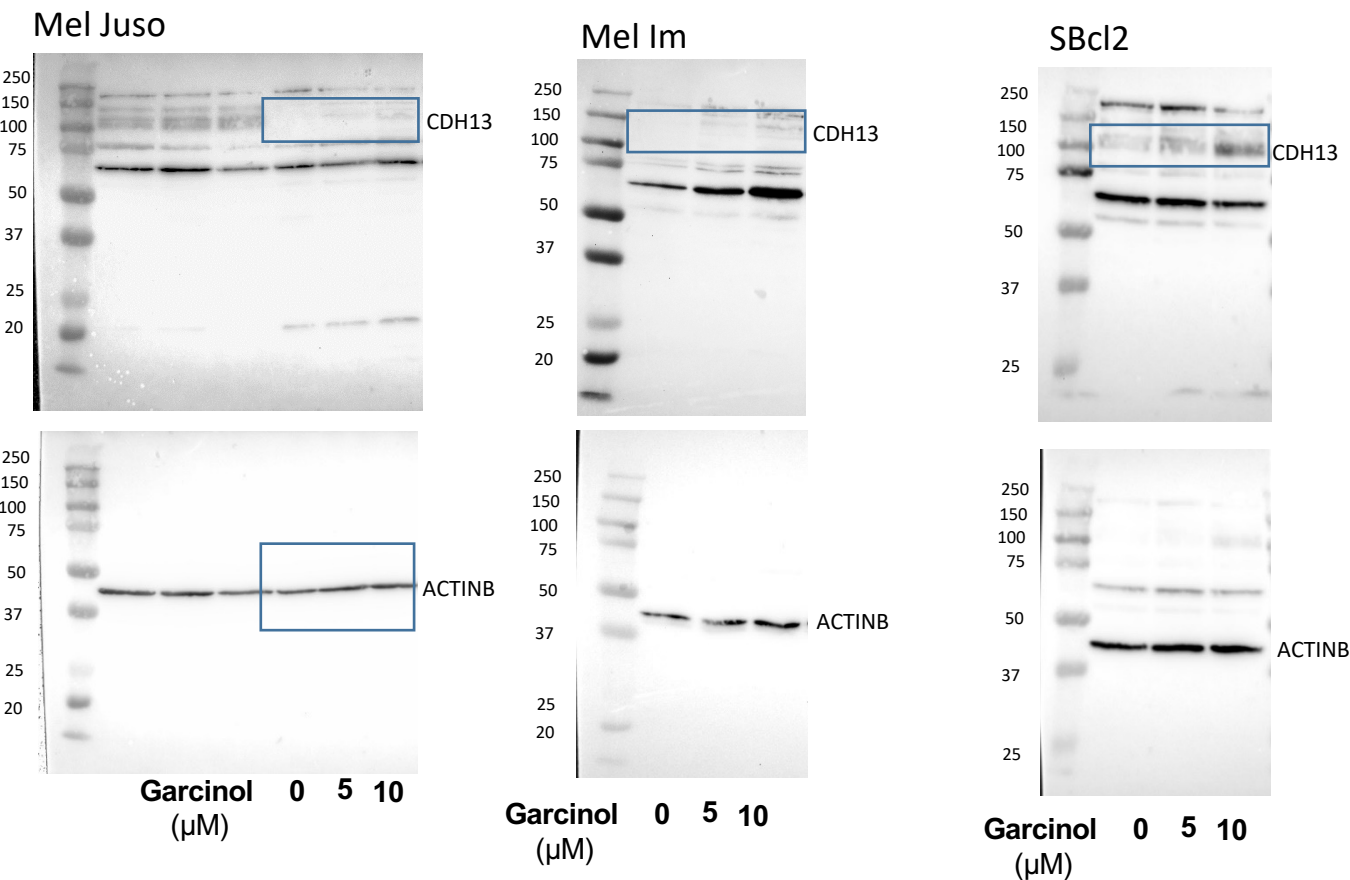

Figure 4 A, B, D, E, F

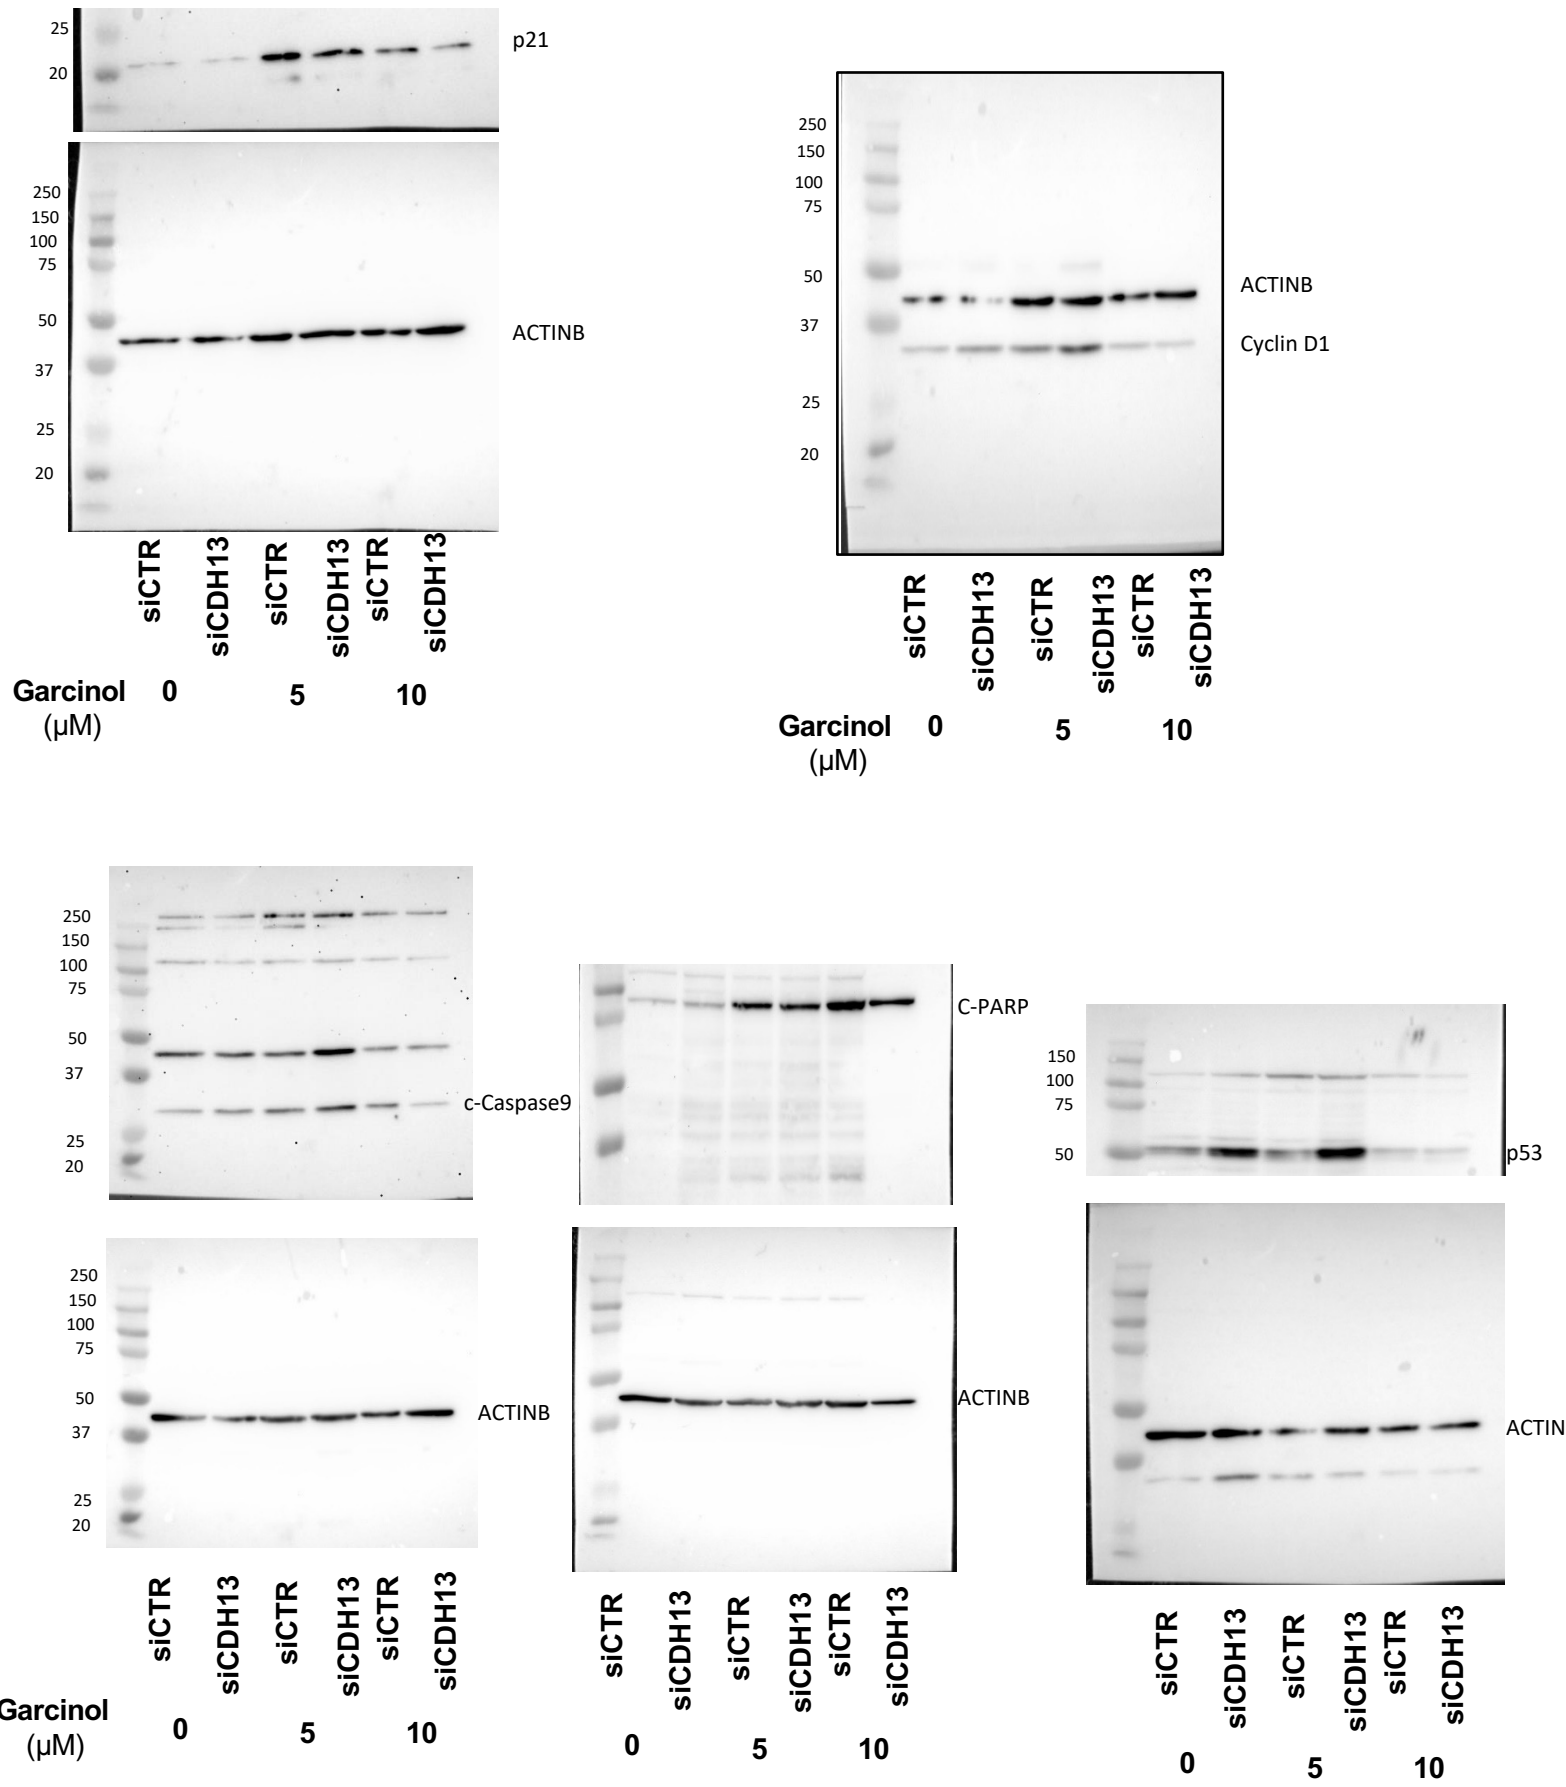

Supplementary Figure 1

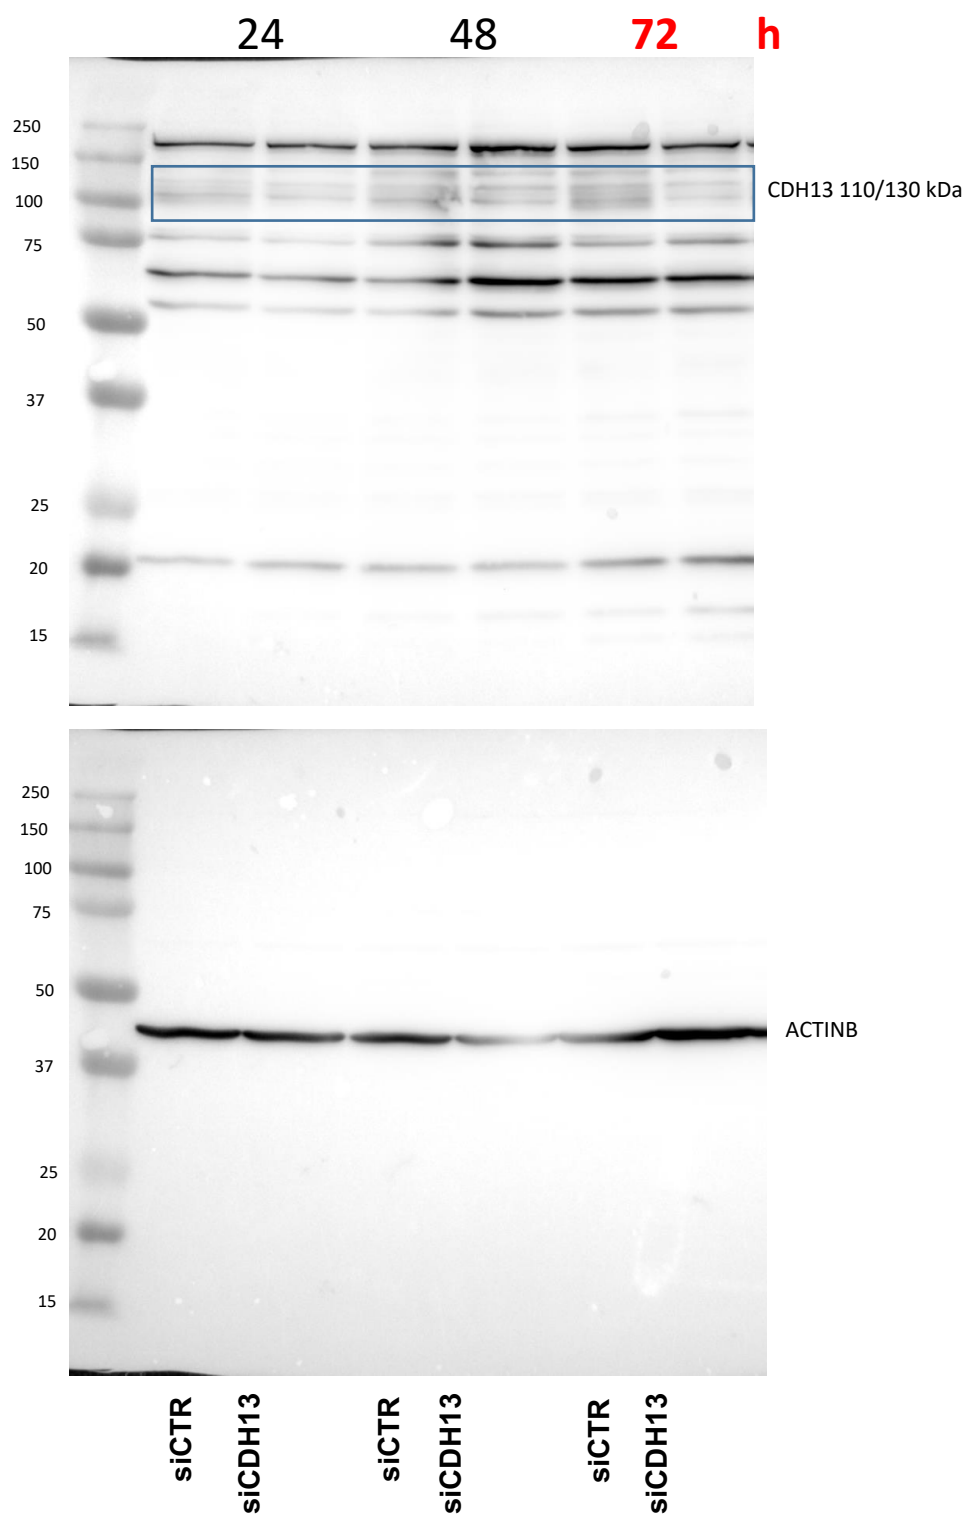

Supplement: s1 [file s1]
